# Supplementary material
Source: Research Square preprint supplement (doi:10.21203/rs.3.rs-9043798/v1)
Supplement: Supplementary file 1 [file 83914a51d7ce999156441b82.pdf]

# Supplementary S1

## Research Questionnaire

---

**Study Title: Assessment of Clinical and Risk Factors Among Hemodialysis Patients**

Institution: Amran University – Faculty of Medicine and Health Sciences – Department of Laboratory Sciences

Country: Republic of Yemen

### Participant Information

This questionnaire is designed for scientific research purposes. All information provided will remain confidential and will be used only for academic research. Participation is voluntary.

#### Section A: Demographic Information

1. Patient Name: \_\_\_\_\_
2. Age: \_\_\_\_\_
3. Gender:  Male  Female
4. Marital Status:  Single  Married  Divorced
5. Residence: \_\_\_\_\_
6. District: \_\_\_\_\_
7. Governorate: \_\_\_\_\_

#### Section B: Medical History

8. Do you suffer from any chronic diseases? (Check all that apply)

- Respiratory diseases
- Cardiovascular diseases
- Diabetes mellitus
- Hypertension
- None

Other (please specify): \_\_\_\_\_

9. What medications were you taking before developing kidney failure?

\_\_\_\_\_

10. What medications are you currently taking?

\_\_\_\_\_

11. How long have you been undergoing hemodialysis?

Less than 1 year

1–3 years

3–6 years

More than 6 years

### Section C: Causes and Risk Factors of Kidney Failure

12. What factor caused the development of kidney failure? (Check all that apply)

Kidney inflammation

Kidney stones

High blood pressure

Diabetes mellitus

Hereditary causes

Polycystic kidney disease

Urinary tract infections

Congenital kidney problems

Cancer chemotherapy

Use of certain medications

Other (please specify): \_\_\_\_\_

13. What is your source of drinking water?

Wells

- Dams
- Springs
- Tap water
- Water treatment plants

14. Have you previously undergone a kidney transplant that later failed?

- Yes  No

If yes, what were the causes? \_\_\_\_\_

#### **Section D: Complications Associated with Kidney Failure**

15. What diseases do you suffer from due to kidney failure? (Check all that apply)

- Cardiovascular diseases
- Hyperkalemia
- Fluid retention
- Hepatitis
- Hypertension
- Bone diseases
- Anemia
- Skin changes
- Other (please specify): \_\_\_\_\_

#### **Section E: Clinical and Drug History**

16. Have you ever undergone surgery involving catheter use?

- Yes  No

17. Have you previously suffered from any of the following diseases?

- Viral infection
- Bacterial infection
- Malaria

18. Do you suffer from immune or hypersensitivity diseases?

Yes  No

19. Have you been informed about the cause of your kidney failure?

Yes  No

If yes, specify: \_\_\_\_\_

20. What symptoms did you experience before being diagnosed with kidney failure?

Back pain

Blood in urine

Absence of urination

Decreased urination

Swelling (edema)

Protein in urine

High blood pressure

21. Have you used Diclofenac Sodium as a pain reliever?

Yes  No

If yes, how frequently?

Once or twice daily

Two to four times daily

Sometimes

Rarely

22. Did you suffer from osteoporosis, arthritis, or rheumatism and take treatment for it?

Yes  No

If yes:  Sometimes  Rarely

23. Do you have any family members with kidney failure?

Yes  No

If yes, relationship: \_\_\_\_\_
